# Supplementary material for: Heterogeneity of pneumococcal phase variants in invasive human infections
Source: PubMed Central journal article supplement (PMC1555587; doi:10.1186/1471-2180-6-67), 2006-07-26
Supplement: 1471-2180-6-67-S1.pdf [file 1471-2180-6-67-S1.pdf]

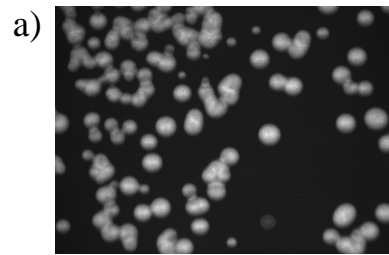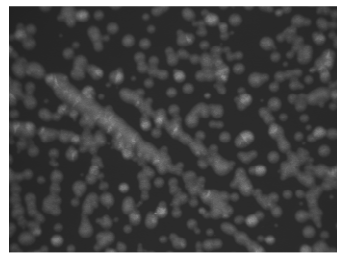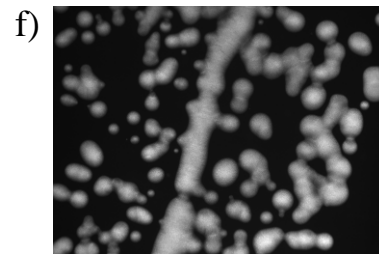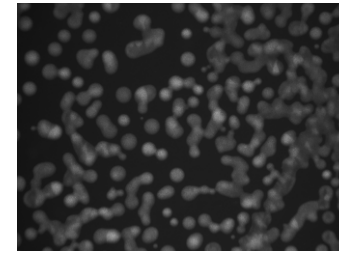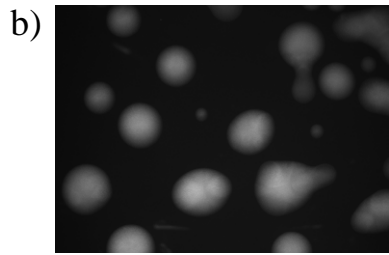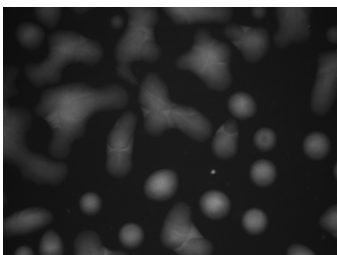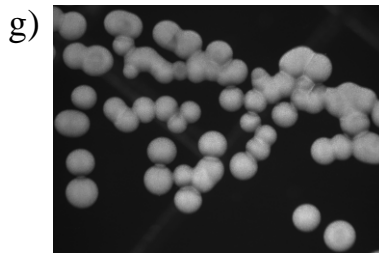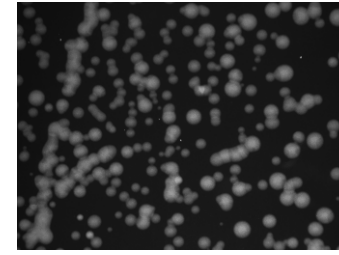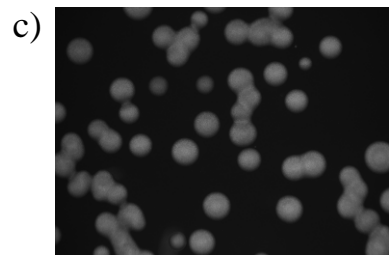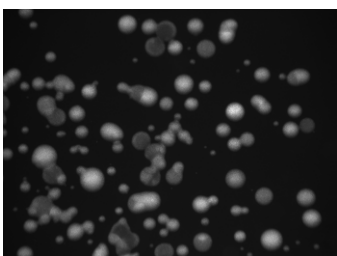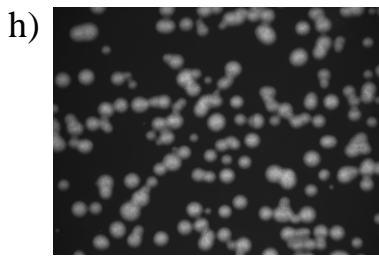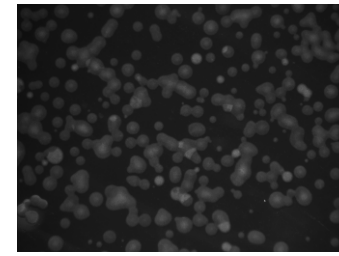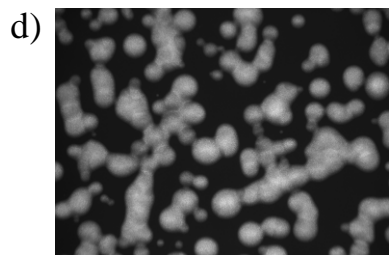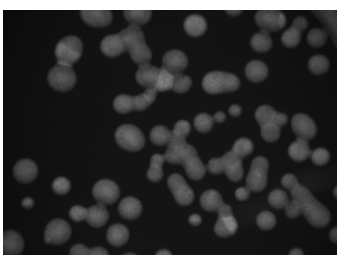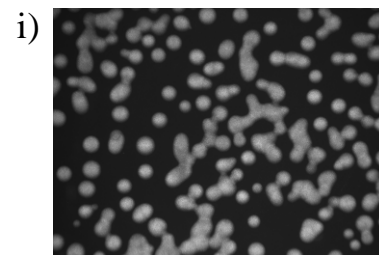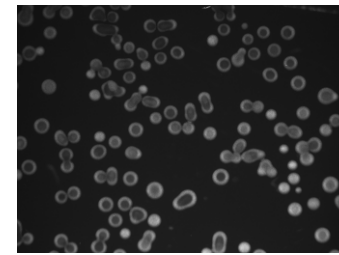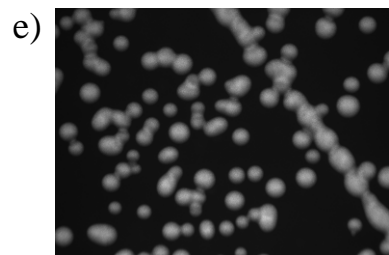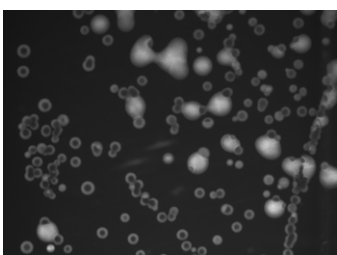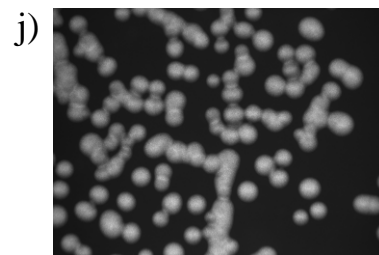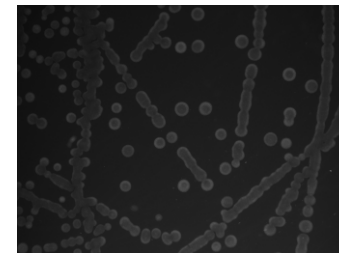

## Supplemental figure

**Colonies of invasive pneumococci expressing 10 different serotypes representing various phenotypes.** Panels on the left represent mostly colonies with an opaque phenotype whereas panels on the right represent fields with mostly transparent colonies or mixtures of the various phenotypes. a) Serotype 1; left panel magnification  $\times 20$ , right panel magnification  $\times 25$ . b) Serotype 3; left  $\times 12$ , right  $\times 8$ . c) Serotype 4; right  $\times 25$ , left  $\times 25$ . d) Serotype 7F, left  $\times 25$ , right  $\times 32$ . e) Serotype 8, left  $\times 20$ , right  $\times 12$ . f) Serotype 9V, left  $\times 16$ , right  $\times 20$ . g) Serotype 12B, left  $\times 20$ , left  $\times 16$ . h) Serotype 14, left  $\times 25$ , right  $\times 25$ . i) Serotype 19A, left  $\times 20$ , right  $\times 12$ . j) Serotype 23F, left  $\times 20$ , right  $\times 12$ .
